# Supplementary material for: INO80 is Required for Osteogenic Differentiation of Human Mesenchymal Stem Cells
Source: PubMed Central journal article supplement (PMC5090198; doi:10.1038/srep35924), 2016-11-02
Supplement: srep35924-s1.pdf [file srep35924-s1.pdf]

# **INO80 is Required for Osteogenic Differentiation of Human Mesenchymal Stem Cells**

Chenchen Zhou<sup>1</sup>, Jing Zou<sup>1,2</sup>, Shujuan Zou<sup>1,2</sup>, Xiaobing Li<sup>1,2,\*</sup>

1 State Key Laboratory of Oral Diseases, West China Hospital of Stomatology, Sichuan University, Chengdu, China

2 Department of Orthodontics, West China School of Stomatology, Sichuan University, Chengdu, China

\*: Corresponding author

Xiaobing Li

State Key Laboratory of Oral Diseases, West China Hospital of Stomatology, Sichuan University

14 Third Section, Renmin Nan Road, Chengdu 610041, China.

E-mail address: [lx\\_b\\_30@hotmail.com](mailto:lx_b_30@hotmail.com)

Tel: +86 18628031391

## Supplementary Table 1 Primers and shRNA sequences

### Realtime RT-PCR primers

|          |                               |
|----------|-------------------------------|
| INO80 F  | 5'-TGCGACAAACGTCAGCTATCT-3'   |
| INO80 R  | 5'-CTGGGGCAATAATGGATTACTGT-3' |
| INO80b F | 5'-AGCCTCAGCTCAAACCTCAAAT-3'  |
| INO80b R | 5'-TTATCCACAACCATAAGGGGAGA-3' |
| INO80c F | 5'-TCGCTTCTGAAAGGGCATTG-3'    |
| INO80c R | 5'-CTTAGCTGGCTTAAAGGATGGAG-3' |
| INO80d F | 5'-ATAAGCCCTTGTGCTCATATAGC-3' |
| INO80d R | 5'-AGCGTTGGCTGTTATACTTGG-3'   |
| INO80e F | 5'-TACCGGAATCTGAAGCGGAAG-3'   |
| INO80e R | 5'-TCTAGGAGGAACTCTTGTCCC-3'   |
| INO80f F | 5'-GCGTTGCCTCCCCTATTTG-3'     |
| INO80f R | 5'-CTGCGATTTAATTCCCGCTGG-3'   |
| INO80g F | 5'-GAGGCACCAGAGTTAGTCTGC-3'   |
| INO80g R | 5'-GGAGGTGTTACGTTGAGAATC-3'   |
| Actl6a F | 5'-TGGAGGCCATTTACCTCTAA-3'    |
| Actl6a R | 5'-TCTTTGCTCTAGTATTCCACGGT-3' |
| Mcrs1 F  | 5'-GGGCTGCTAGATTCATCCCTG-3'   |
| Mcrs1 R  | 5'-GGAGGAGCTTCTCCGTTTAGG-3'   |
| Ruvbl1 F | 5'-AGGTGAAGAGCACTACGAAGA-3'   |
| Ruvbl1 R | 5'-CTACTATGACGCCACATGCCT-3'   |
| Ruvbl2 F | 5'-GTCGGGCAGTCCTTATTGCT-3'    |
| Ruvbl2 R | 5'-TGGTCGATCAATCTGGATCTCC-3'  |
| Runx2 F  | 5'-TGGTACTGTCATGGCGGGTA-3'    |
| Runx2 R  | 5'-TCTCAGATCGTTGAACCTTGCTA-3' |
| Osx F    | 5'-CCTCTGCGGGACTCAACAAC-3'    |
| Osx R    | 5'-AGCCCATTAGTGCTTGTAAGG-3'   |
| Col1a1 F | 5'-GAGGGCCAAGACGAAGACATC-3'   |
| Col1a1 R | 5'-CAGATCACGTCATCGCACAAC-3'   |
| Opn F    | 5'-CTCCATTGACTCGAACGACTC-3'   |
| Opn R    | 5'-CAGGTCTGCGAACTTCTTAGAT-3'  |
| Wdr5 F   | 5'-AATTCAGCCCGAATGGAGAGT-3'   |
| Wdr5 R   | 5'-AGGCTACATCGGATATTCCCAG-3'  |
| Axin2 F  | 5'-CAACACCAGGCGGAACGAA-3'     |
| Axin2 R  | 5'-GCCCAATAAGGAGTGTAAGGACT-3' |

Myc F 5'-GGCTCCTGGCAAAAGGTCA-3'  
Myc R 5'-CTGCGTAGTTGTGCTGATGT-3'

shRNA sequence  
Ino80 5'-GGGAAAUCCUCAUGAUAGAUU-3'  
Wdr5 5'-CGAAAGAGAUUGUACAGAA-3'
